# Supplementary material
Source: publisher figshare collection journal article supplement (https://tandf.figshare.com/ndownloader/files/13729241)

## Supporting Information

### **Design, synthesis and biological evaluation of novel 4-anilinoquinazoline derivatives as EGFR inhibitors with the potential to inhibit the gefitinib-resistant nonsmall cell lung cancers**

Caolin Wang <sup>†</sup>, Shan Xu<sup>†</sup>, Liang Peng, Bingliang Zhang, Hong Zhang, Yingying Hu, Pengwu Zheng\*,  
Wufu Zhu\*

*Jiangxi Provincial Key Laboratory of Drug Design and Evaluation, School of Pharmacy, Jiangxi  
Science & Technology Normal University, 605 Fenglin Road, Nanchang, Jiangxi 330013, China*

<sup>†</sup> These authors contribute equally to this work

\*To whom correspondence should be addressed. [zhuwufu-1122@163.com](mailto:zhuwufu-1122@163.com)(W.Zhu),  
[zhengpw@126.com](mailto:zhengpw@126.com) (P. Zheng)

# Contents

## Compound characterization

### 14: $^1\text{H}$ NMR

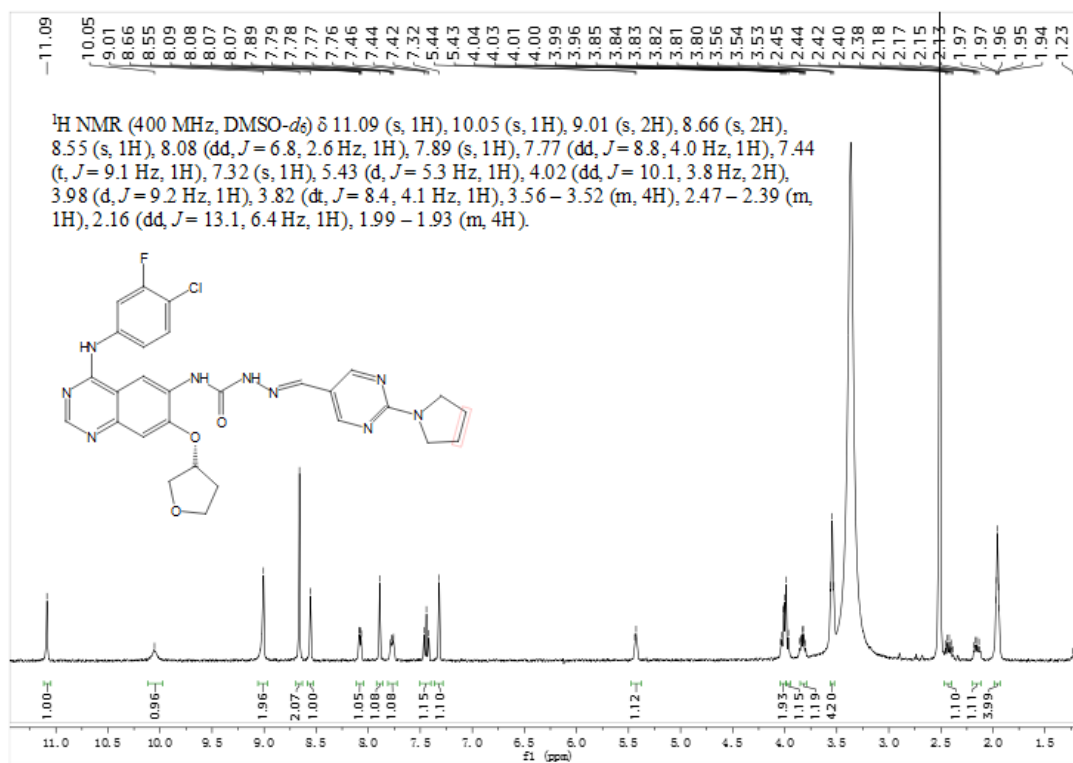

### 14: $^{13}\text{C}$ NMR

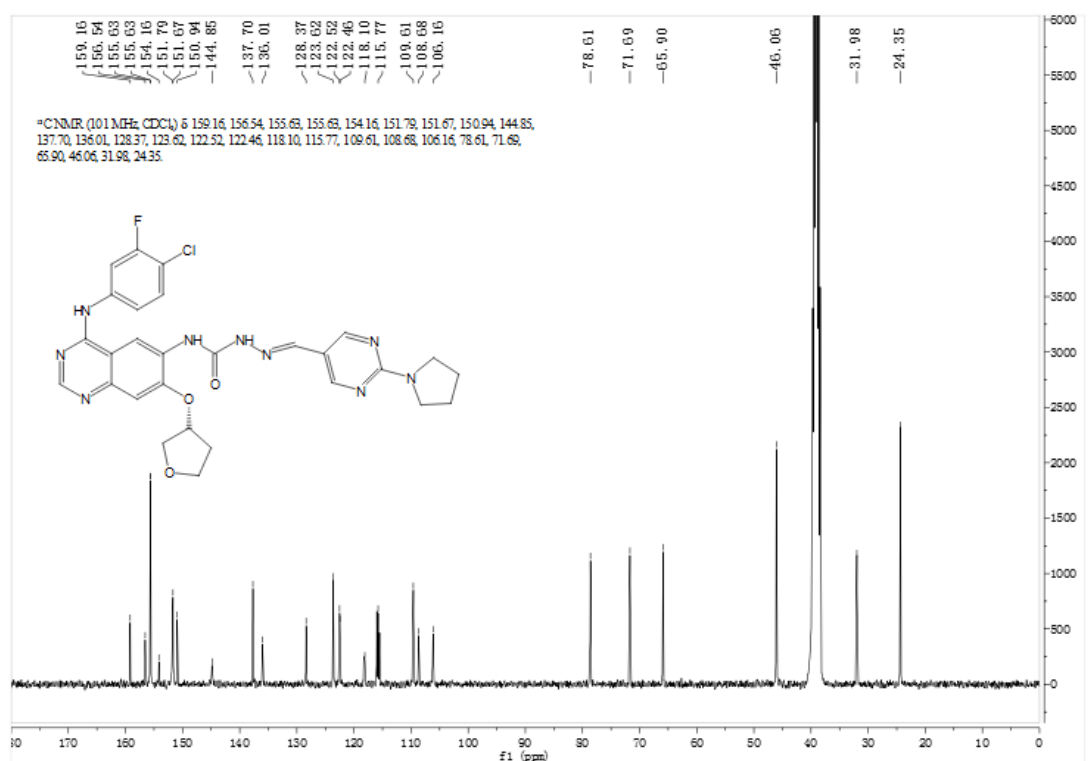

18: <sup>1</sup>H NMR

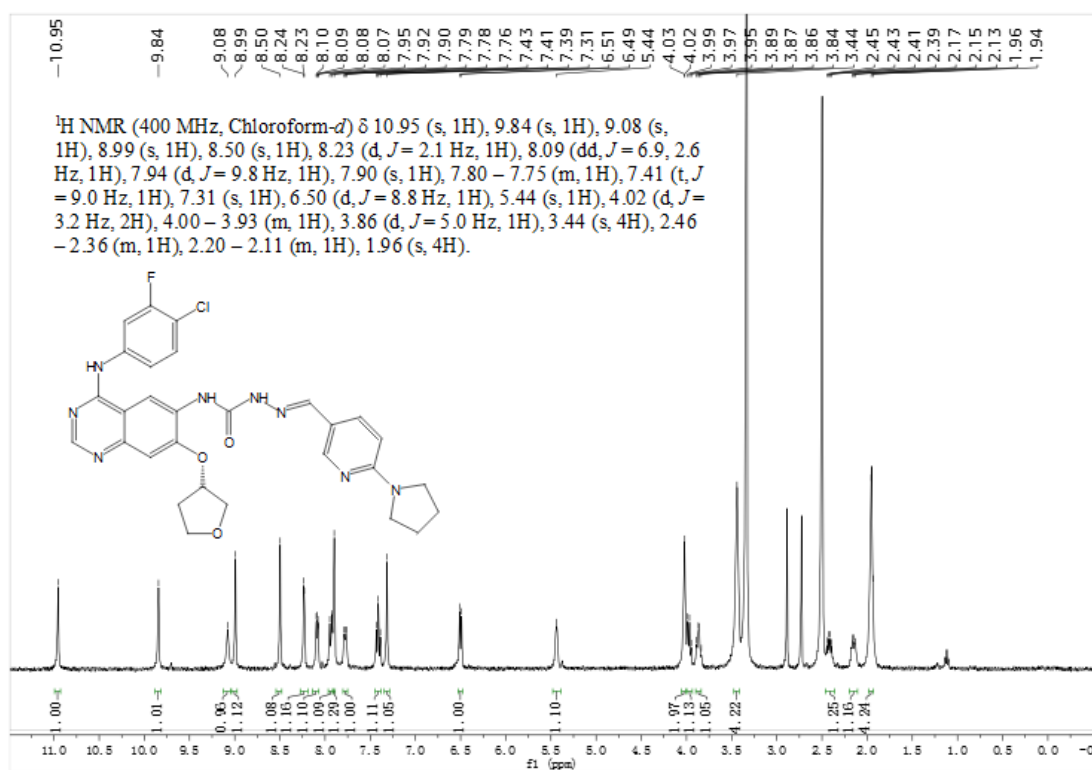

28: <sup>1</sup>H NMR

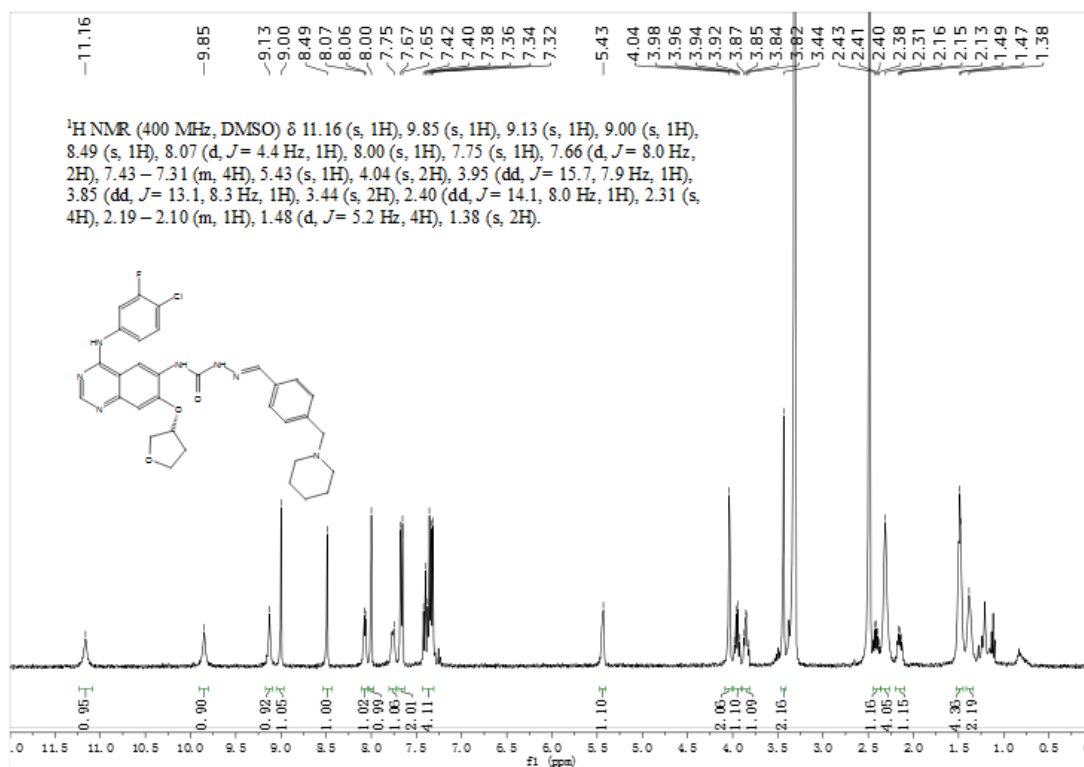

34: <sup>1</sup>H NMR

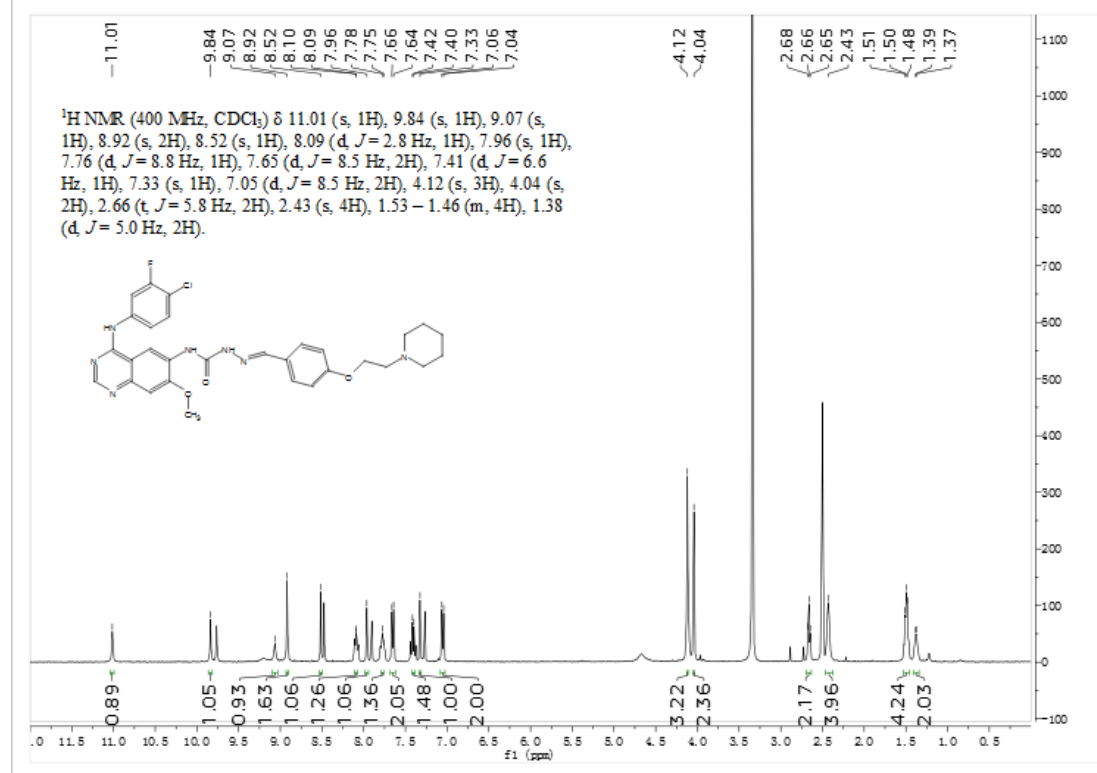

37: <sup>1</sup>H NMR

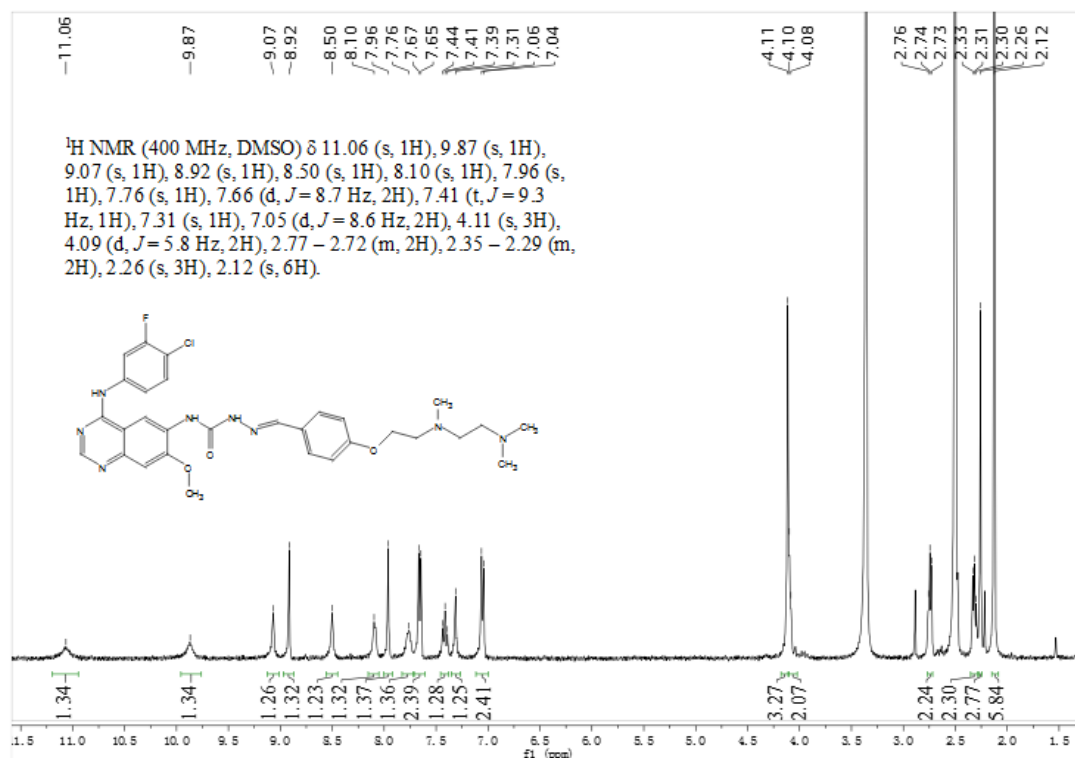

### 38: <sup>1</sup>H NMR

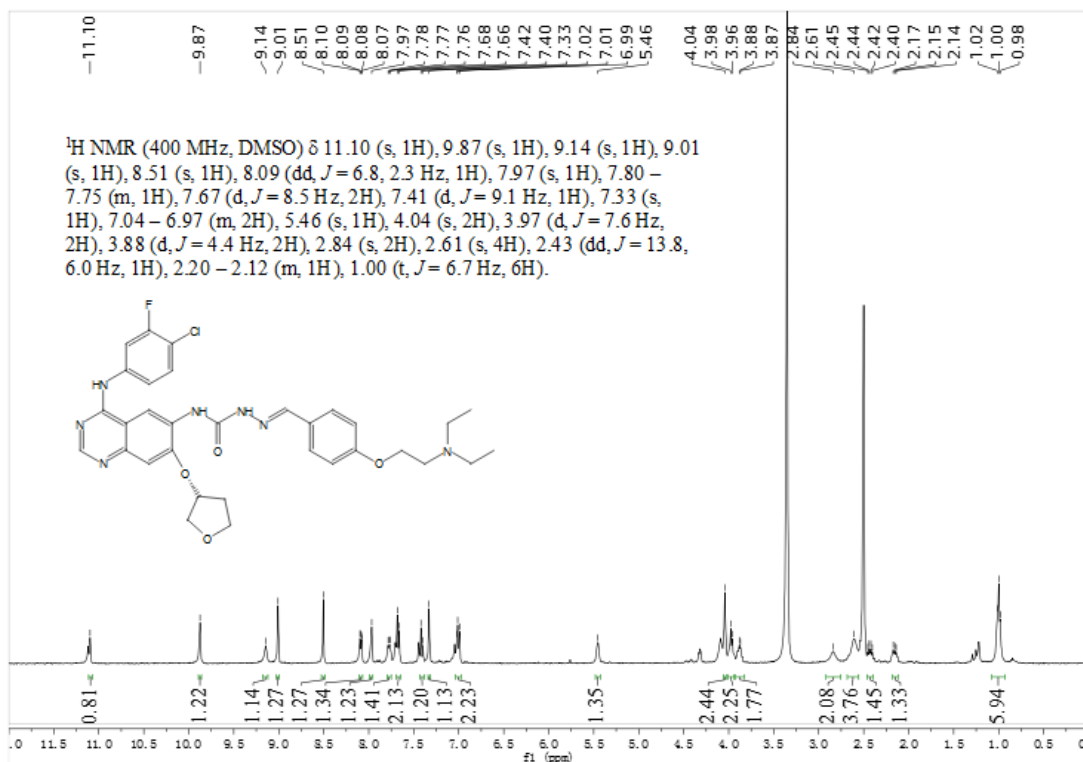

### 39: <sup>1</sup>H NMR

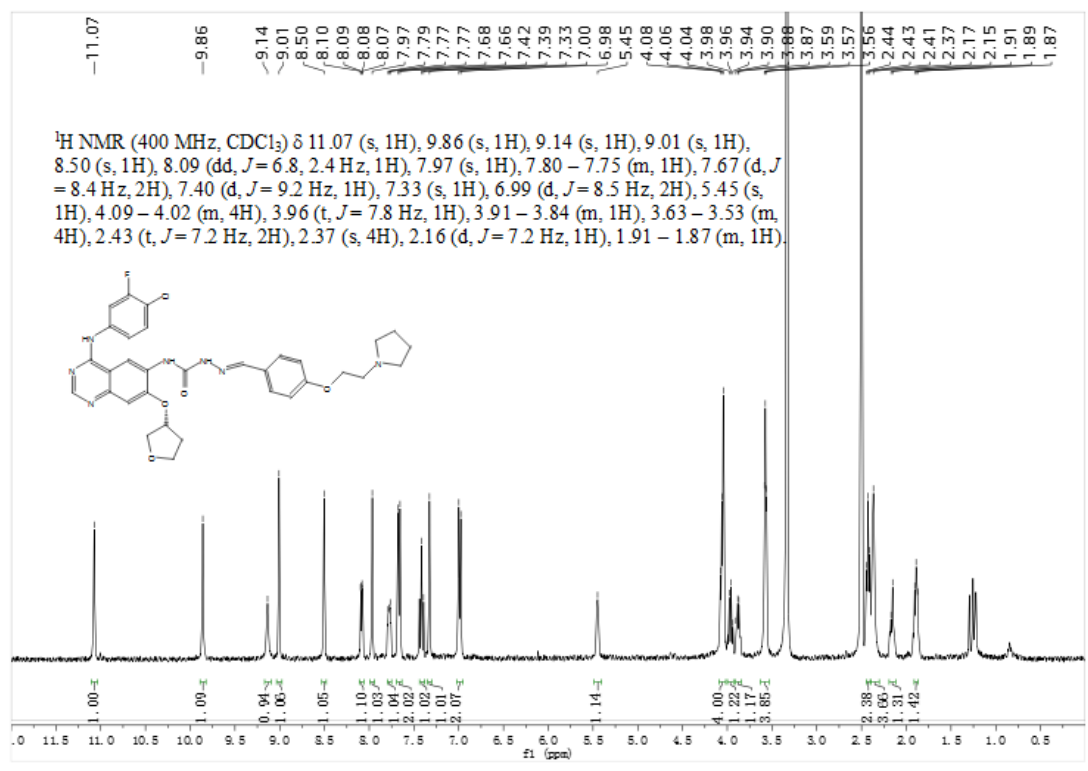

#### 41: <sup>1</sup>H NMR

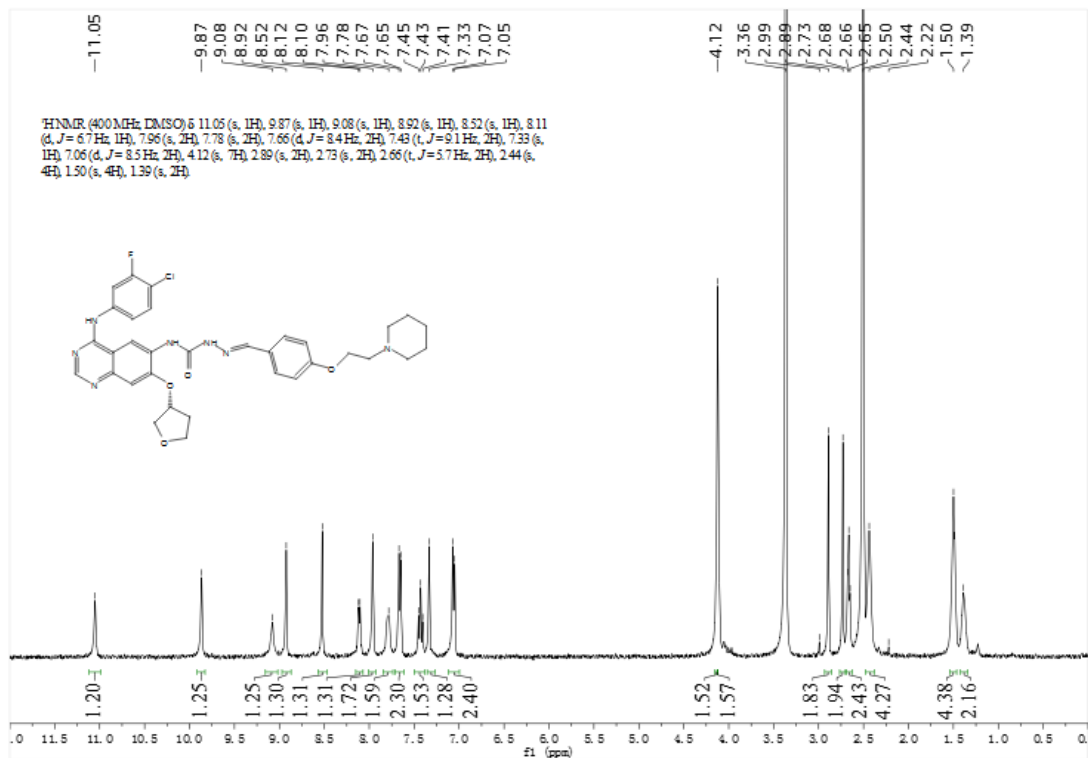

# 47: <sup>1</sup>H NMR

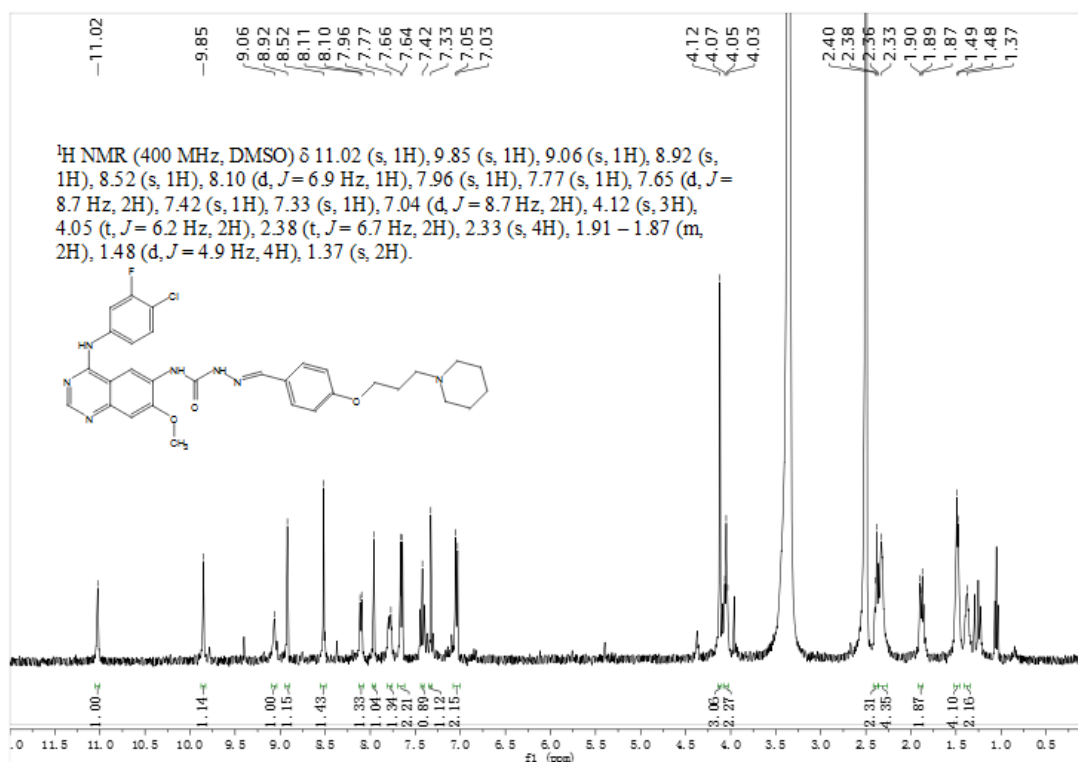

# 51: <sup>1</sup>H NMR

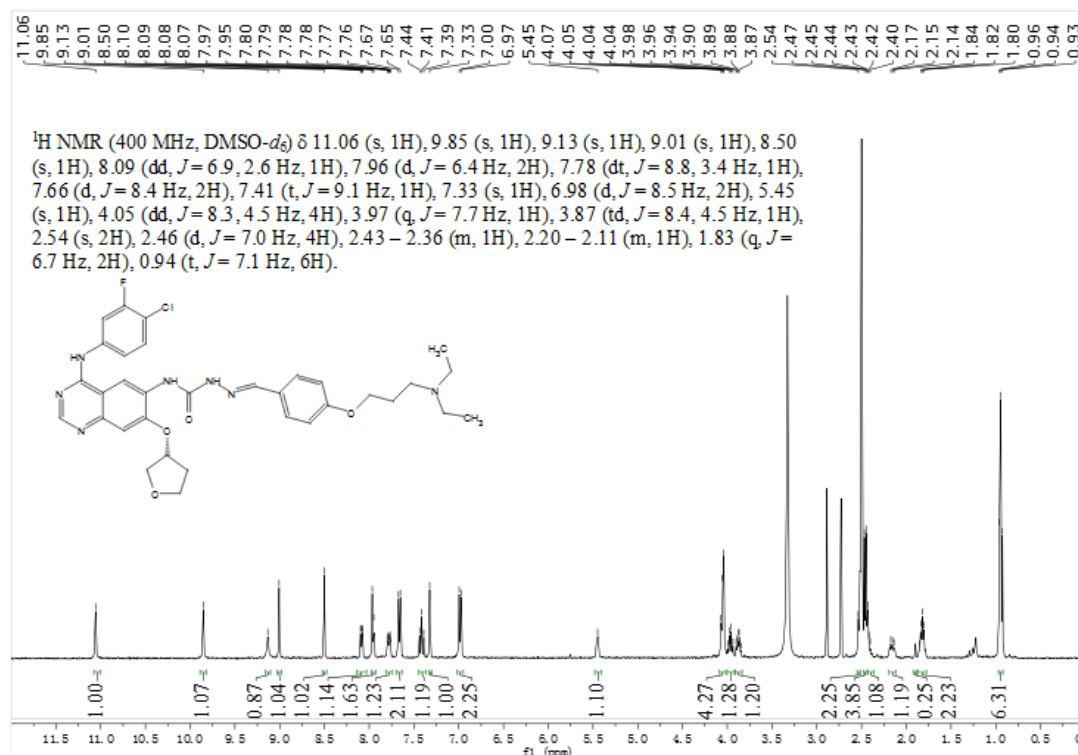

Supplement: Supplementary file 1 [file 13729241]
